# Supplementary material for: Community Needs Assessment of Ten Rural Villages in Karnataka and Tamil Nadu, India
Source: Research Square preprint supplement (doi:10.21203/rs.3.rs-396287/v1), 2021-05-03
Supplement: Supplementary file 1 [file 8c3f45eb3e566c373d46fd3e.pdf]

Date: 02/\_\_\_/2019 Cluster Number: \_\_\_ Interview Number: \_\_\_ Team name: \_\_\_\_\_

**DEMOGRAPHICS****COMPLETE BEFORE BEGINNING SURVEY.** Type of structure:  Single family  Multiple unit  Other \_\_\_\_\_

Q1. Including yourself, how many people live in your HH? \_\_\_#\_\_\_

Q1a. Male \_\_\_#\_\_\_ Female \_\_\_#\_\_\_

Q3. What is the main language spoken in your HH?

 Tamil  Kannada  Telugu  Other \_\_\_\_\_  
 DK  RefQ2. Including yourself, how many people living in your HH are  
<2 yrs old? \_\_\_#\_\_\_ 2-17 yrs? \_\_\_#\_\_\_ 18-64 yrs? \_\_\_#\_\_\_ 65+ yrs? \_\_\_#\_\_\_  DK  Ref**Now we are going to ask about your HOUSEHOLD's experience over the past year.**Q4. Is anyone in your household pregnant?  
 Yes  No  DK  Ref

Q4b. \_\_\_#\_\_\_

Q5. Do you or does a member of your household have serious difficulty hearing?  
 Yes  No  DK  RefQ6. Do you or a member of your household have difficulty walking or climbing stairs?  
 Yes  No  DK  RefQ7. In the past year, have you used a stone fire, charcoal or gas grill to cook food?  
 Yes – inside w/ windows open  Yes – inside w/ windows closed  
 Yes – Outside  No  
 DK  RefQ8. Do you have access to a working telephone?  
 Yes  No  DK  RefQ8a. Do you or a member of your HH have access to the internet?  
 Yes  No  DK  RefQ9. Do you or any member of your HH need?  
Daily Medications  Yes  No  DK  Ref  
Dialysis  Yes  No  DK  Ref  
Oxygen  Yes  No  DK  Ref  
Wheelchair/cane/walker  Yes  No  DK  Ref  
Other care? \_\_\_\_\_  Yes  No  DK  RefQ10. Currently, do you or any members of your HH need:  
Food  Yes  No  DK  Ref  
Water  Yes  No  DK  Ref  
Medication  Yes  No  DK  Ref  
Other \_\_\_\_\_  Yes  No  DK  RefQ11. Does your HH currently have the following:  
Running water  Yes  No  DK  Ref  
Access to cistern water  Yes  No  DK  Ref  
Access to functioning toilet  Yes  No  DK  Ref  
Grid electricity  Yes  No  DK  Ref  
Working generator  Yes  No  DK  RefQ12. What is your HHs current source of drinking water? *(Check ALL)*  
 Tap  Bottled  Cistern  Other \_\_\_\_\_  DK  RefQ12a. *IF CISTERN*, how does your HH treat your cistern water?  
*(Check ALL)*  Bleach  Mosquito dunk  Filter  UV light  
 Boil  Other \_\_\_\_\_  Do not treat cistern  DK  RefQ12b. *IF running water*, how does your HH treat your running water?  
*(Check ALL)*  
 Bleach  Boil  Filter  Other \_\_\_\_\_  
 Do not treat running water  DK  RefQ13. How many days of adequate drinking water (besides tap) does your household currently have? (4 liters/person/day)  
\_\_\_#\_\_\_ of days  None  DK  RefQ14. How many days of non-perishable food (e.g., canned goods, rice, nuts) does your household currently have?  
\_\_\_#\_\_\_ of days  None  DK  RefQ15. How many days of medication does your household currently have, on average, for each person who takes prescribed medication?  
\_\_\_#\_\_\_ of days  None  No prescriptions  DK  RefQ16. Currently, how concerned are you and members of your HH about getting diseases mosquitoes may carry?  Very concerned  
 Somewhat concerned  Not concerned at all  DK  RefQ16a. *IF VERY or SOMEWHAT*, which disease(s)? *(DO NOT READ – Check all that apply)*  Zika  Dengue  Chikungunya  
 Yellow Fever  Malaria  
 Other \_\_\_\_\_  DK  RefQ17. In the past year has anyone in your HH been unable to work/perform duties due to illness?  
 Yes  No  DK  RefQ18. Is there anyone in your household who requires urgent medical care?  
 Yes  No  DK  RefQ19. Does your HH currently have access to transportation if needed? *(Check ONE)*  
 All the time  Sometimes  Never  No need  DK  RefQ20. What is your household's greatest need at this time?  
 DK  Ref**HEALTH COMMUNICATION**Q21. How does your HH prefer to receive information from the Government/Ministry of Health? *(Check ALL that apply)*  
 Newspaper  Internet news or other website  Social media  
 TV  Radio  Friends/Family/Word of Mouth  
 Place of worship  
 Other, \_\_\_\_\_  None  DK  RefQ22. What health messages has your HH heard in the past year? *(DO NOT READ RESPONSES – Check all that apply)*  
 Vaccination  Food safety  Handwashing  
 Water treatment  Women's Health  
 Mental health  Mosquito/vector control  
 Other \_\_\_\_\_  None  DK  Ref**HEALTH/BEHAVIORAL HEALTH**Q23. Has any member of your HH died in the past year? *(Check ONE)*  
 Yes \_\_\_#\_\_\_  No one  DK  RefQ24a. Ages of member of HH who died? *(Q24b)*  
<2 yrs old? \_\_\_#\_\_\_ 2-17 yrs? \_\_\_#\_\_\_ 18-64 yrs? \_\_\_#\_\_\_ 65+ yrs? \_\_\_#\_\_\_  
 DK  RefQ24b. Did any pregnant members of your HH die in the past year?  
 Yes \_\_\_#\_\_\_  No one  DK  RefQ25. In the past year, have you or members of your HH had:  
Difficulty concentrating  Yes  No  DK  Ref  
Trouble sleeping  Yes  No  DK  Ref  
Nightmares  Yes  No  DK  Ref  
Loss of appetite  Yes  No  DK  Ref  
Sad mood  Yes  No  DK  Ref  
Difficulty enjoying things  Yes  No  DK  Ref  
Unusually happy mood  Yes  No  DK  Ref  
Frequent worries  Yes  No  DK  Ref  
Thoughts about suicide  Yes  No  DK  Ref  
Agitated behavior  Yes  No  DK  Ref

Community Assessment for Public Health Emergency Response (CASPER) – Shanti Bhavan

DK=Don't Know Ref=Refused NA=Not Applicable HH=Household

|                                                                                                                                                                                                                                                                                                                                                                                                                                                                                                                                                                                                                                                                                                                                                                                                                                                                                                                                                                                                                                                                                                                                                                                                                                                                                                                                                                                       |                                                                                                                                                                                                                                                                                                                                                                                                                                                                                                                                                                                                                                                                                                                                                                                                                                                                                                                                                                                                                                                                                                                                                                                                                                                                                                                                                                                                                                                                                                                                                                                                                                                  |
|---------------------------------------------------------------------------------------------------------------------------------------------------------------------------------------------------------------------------------------------------------------------------------------------------------------------------------------------------------------------------------------------------------------------------------------------------------------------------------------------------------------------------------------------------------------------------------------------------------------------------------------------------------------------------------------------------------------------------------------------------------------------------------------------------------------------------------------------------------------------------------------------------------------------------------------------------------------------------------------------------------------------------------------------------------------------------------------------------------------------------------------------------------------------------------------------------------------------------------------------------------------------------------------------------------------------------------------------------------------------------------------|--------------------------------------------------------------------------------------------------------------------------------------------------------------------------------------------------------------------------------------------------------------------------------------------------------------------------------------------------------------------------------------------------------------------------------------------------------------------------------------------------------------------------------------------------------------------------------------------------------------------------------------------------------------------------------------------------------------------------------------------------------------------------------------------------------------------------------------------------------------------------------------------------------------------------------------------------------------------------------------------------------------------------------------------------------------------------------------------------------------------------------------------------------------------------------------------------------------------------------------------------------------------------------------------------------------------------------------------------------------------------------------------------------------------------------------------------------------------------------------------------------------------------------------------------------------------------------------------------------------------------------------------------|
| <p><b>Q26.</b> Were you or anyone in your HH injured in the past year?<br/><i>(Check ALL that apply)</i></p> <p><input type="checkbox"/> Yes – still injured <input type="checkbox"/> Yes – recovered <input type="checkbox"/> No <input type="checkbox"/> DK <input type="checkbox"/> Ref</p>                                                                                                                                                                                                                                                                                                                                                                                                                                                                                                                                                                                                                                                                                                                                                                                                                                                                                                                                                                                                                                                                                        | <p><b>Q33.</b> In the past year, have you or members of your HH</p> <p>Witnessed violent behavior/threats <input type="checkbox"/> Yes <input type="checkbox"/> No <input type="checkbox"/> DK <input type="checkbox"/> Ref</p> <p>Experienced violent behavior/threats <input type="checkbox"/> Yes <input type="checkbox"/> No <input type="checkbox"/> DK <input type="checkbox"/> Ref</p> <p>Experienced natural disasters <input type="checkbox"/> Yes <input type="checkbox"/> No <input type="checkbox"/> DK <input type="checkbox"/> Ref</p> <p>Had other traumatic experiences <input type="checkbox"/> Yes <input type="checkbox"/> No <input type="checkbox"/> DK <input type="checkbox"/> Ref</p> <p>If yes? What types? _____</p>                                                                                                                                                                                                                                                                                                                                                                                                                                                                                                                                                                                                                                                                                                                                                                                                                                                                                                   |
| <p><b>Q27</b> In the past year has anybody in your HH experienced?</p> <p>Cough <input type="checkbox"/> Yes <input type="checkbox"/> No <input type="checkbox"/> DK <input type="checkbox"/> Ref</p> <p>Fever <input type="checkbox"/> Yes <input type="checkbox"/> No <input type="checkbox"/> DK <input type="checkbox"/> Ref</p> <p>Nausea/stomach ache/diarrhea <input type="checkbox"/> Yes <input type="checkbox"/> No <input type="checkbox"/> DK <input type="checkbox"/> Ref</p> <p>Rash <input type="checkbox"/> Yes <input type="checkbox"/> No <input type="checkbox"/> DK <input type="checkbox"/> Ref</p> <p>Severe headache <input type="checkbox"/> Yes <input type="checkbox"/> No <input type="checkbox"/> DK <input type="checkbox"/> Ref</p> <p>Sore throat/ cold <input type="checkbox"/> Yes <input type="checkbox"/> No <input type="checkbox"/> DK <input type="checkbox"/> Ref</p> <p>TB or Tuberculosis <input type="checkbox"/> Yes <input type="checkbox"/> No <input type="checkbox"/> DK <input type="checkbox"/> Ref</p> <p>Worsening of chronic illness <input type="checkbox"/> Yes <input type="checkbox"/> No <input type="checkbox"/> DK <input type="checkbox"/> Ref</p> <p>If yes? What types? _____</p> <p>Other? _____ <input type="checkbox"/> Yes <input type="checkbox"/> No <input type="checkbox"/> DK <input type="checkbox"/> Ref</p> | <p><b>Q28.</b> If you or a member of your HH has given birth, where did they give birth?</p> <p><input type="checkbox"/> Hospital <input type="checkbox"/> Clinic <input type="checkbox"/> Home or private dwelling <input type="checkbox"/> N/A</p>                                                                                                                                                                                                                                                                                                                                                                                                                                                                                                                                                                                                                                                                                                                                                                                                                                                                                                                                                                                                                                                                                                                                                                                                                                                                                                                                                                                             |
| <p><b>Q29.</b> In the past year, have you or any members of your HH experienced worsening of</p> <p>Asthma/COPD <input type="checkbox"/> Yes <input type="checkbox"/> No/NA <input type="checkbox"/> DK <input type="checkbox"/> Ref</p> <p>Allergies <input type="checkbox"/> Yes <input type="checkbox"/> No/NA <input type="checkbox"/> DK <input type="checkbox"/> Ref</p> <p>Diabetes <input type="checkbox"/> Yes <input type="checkbox"/> No/NA <input type="checkbox"/> DK <input type="checkbox"/> Ref</p> <p>Hypertension <input type="checkbox"/> Yes <input type="checkbox"/> No/NA <input type="checkbox"/> DK <input type="checkbox"/> Ref</p> <p>Previous mental health condition <input type="checkbox"/> Yes <input type="checkbox"/> No/NA <input type="checkbox"/> DK <input type="checkbox"/> Ref</p> <p>Other _____ <input type="checkbox"/> Yes <input type="checkbox"/> No/NA <input type="checkbox"/> DK <input type="checkbox"/> Ref</p>                                                                                                                                                                                                                                                                                                                                                                                                                     | <p><b>Q34.</b> In the past year, have you or members of your HH</p> <p>Heard sounds, voices that other people did not hear <input type="checkbox"/> Yes <input type="checkbox"/> No <input type="checkbox"/> DK <input type="checkbox"/> Ref</p> <p>Seen shapes or people that other people did not see <input type="checkbox"/> Yes <input type="checkbox"/> No <input type="checkbox"/> DK <input type="checkbox"/> Ref</p> <p>Felt like your mind was playing tricks on you <input type="checkbox"/> Yes <input type="checkbox"/> No <input type="checkbox"/> DK <input type="checkbox"/> Ref</p>                                                                                                                                                                                                                                                                                                                                                                                                                                                                                                                                                                                                                                                                                                                                                                                                                                                                                                                                                                                                                                             |
| <p><b>Q30.</b> In the past year, has it been more difficult for anybody in your HH to get the medical care they need?</p> <p><input type="checkbox"/> Yes <i>(go to Q30a)</i> <input type="checkbox"/> No – not difficult <input type="checkbox"/> No – no need <input type="checkbox"/> DK <input type="checkbox"/> Ref</p> <p><b>Q30a.</b> If YES, why?</p> <p><input type="checkbox"/> Usual clinic/physician closed <input type="checkbox"/> No physician available</p> <p><input type="checkbox"/> Money/cost <input type="checkbox"/> Insurance problems</p> <p><input type="checkbox"/> No transportation <input type="checkbox"/> Other _____ <input type="checkbox"/> DK <input type="checkbox"/> Ref</p> <p><b>Q31.</b> In the past year, how many children in your HH attend school?</p> <p><input type="checkbox"/> All <input type="checkbox"/> Some <input type="checkbox"/> None <input type="checkbox"/> No children <input type="checkbox"/> DK <input type="checkbox"/> Ref</p>                                                                                                                                                                                                                                                                                                                                                                                     | <p><b>Q35.</b> In the past year, have you or members of your HH experienced</p> <p>Increased alcohol consumption <input type="checkbox"/> Yes <input type="checkbox"/> No <input type="checkbox"/> DK <input type="checkbox"/> Ref</p> <p>Increased drug use, including marijuana <input type="checkbox"/> Yes <input type="checkbox"/> No <input type="checkbox"/> DK <input type="checkbox"/> Ref</p> <p>Other _____ <input type="checkbox"/> Yes <input type="checkbox"/> No <input type="checkbox"/> DK <input type="checkbox"/> Ref</p> <p><b>Q36.</b> Has every member of your HH received the polio vaccination?</p> <p><input type="checkbox"/> All <input type="checkbox"/> Some <i>(Q36a)</i> <input type="checkbox"/> None <i>(Q36a)</i> <input type="checkbox"/> DK <input type="checkbox"/> Ref</p> <p><b>Q36a.</b> If SOME or NONE, why not? <i>(Check all that apply)</i></p> <p><input type="checkbox"/> No insurance <input type="checkbox"/> Cost/Cannot pay for vaccination</p> <p><input type="checkbox"/> No vaccination site near me <input type="checkbox"/> No time</p> <p><input type="checkbox"/> Other _____ <input type="checkbox"/> DK <input type="checkbox"/> Ref</p> <p><b>Q37.</b> Has anyone in your household had measles in the last 5 years?</p> <p><input type="checkbox"/> Yes <input type="checkbox"/> No <input type="checkbox"/> DK <input type="checkbox"/> Ref</p> <p><b>Q38.</b> Is everyone in your household vaccinated for measles?</p> <p><input type="checkbox"/> All <input type="checkbox"/> Some <input type="checkbox"/> None <input type="checkbox"/> DK <input type="checkbox"/> Ref</p> |
| <p><b>Q32.</b> In the past year, have you or members of your HH received services from a counselor, religious leader, therapist, or social worker for behavioral health concerns?</p> <p><input type="checkbox"/> Yes <input type="checkbox"/> No – couldn't get services <input type="checkbox"/> No – no need for services <input type="checkbox"/> DK <input type="checkbox"/> Ref</p>                                                                                                                                                                                                                                                                                                                                                                                                                                                                                                                                                                                                                                                                                                                                                                                                                                                                                                                                                                                             | <p><b>Q39.</b> Has every adult in your HH had a tetanus (DTap/Tdap/Td) shot in the past 10 years?</p> <p><input type="checkbox"/> Yes <input type="checkbox"/> No <input type="checkbox"/> DK <input type="checkbox"/> Ref</p> <p><b>Q40.</b> Are all children (up to 18 years old) up to date with their vaccination schedule? <input type="checkbox"/> Yes <input type="checkbox"/> Some <i>(Q40a)</i> <input type="checkbox"/> No <i>(Q40a)</i></p> <p><input type="checkbox"/> No children <input type="checkbox"/> DK <input type="checkbox"/> Ref</p> <p><b>Q40a.</b> If SOME or NONE, why not? <i>(Check all that apply)</i></p> <p><input type="checkbox"/> No insurance <input type="checkbox"/> Cost/Cannot pay for vaccination</p> <p><input type="checkbox"/> No vaccination site near me <input type="checkbox"/> No time</p> <p><input type="checkbox"/> Other _____ <input type="checkbox"/> DK <input type="checkbox"/> Ref</p>                                                                                                                                                                                                                                                                                                                                                                                                                                                                                                                                                                                                                                                                                                  |
| <p><b>Now we are going to ask about YOU as an INDIVIDUAL</b></p>                                                                                                                                                                                                                                                                                                                                                                                                                                                                                                                                                                                                                                                                                                                                                                                                                                                                                                                                                                                                                                                                                                                                                                                                                                                                                                                      |                                                                                                                                                                                                                                                                                                                                                                                                                                                                                                                                                                                                                                                                                                                                                                                                                                                                                                                                                                                                                                                                                                                                                                                                                                                                                                                                                                                                                                                                                                                                                                                                                                                  |
| <p><b>Q41.</b> Over the last <b>2 weeks</b>, how often have you had little interest or pleasure in doing things? <i>(Check ONE)</i></p> <p><input type="checkbox"/> Not at all <input type="checkbox"/> Several days <input type="checkbox"/> More than half the days <input type="checkbox"/> Nearly every day <input type="checkbox"/>DK <input type="checkbox"/> Refused</p>                                                                                                                                                                                                                                                                                                                                                                                                                                                                                                                                                                                                                                                                                                                                                                                                                                                                                                                                                                                                       |                                                                                                                                                                                                                                                                                                                                                                                                                                                                                                                                                                                                                                                                                                                                                                                                                                                                                                                                                                                                                                                                                                                                                                                                                                                                                                                                                                                                                                                                                                                                                                                                                                                  |
| <p><b>Q42.</b> Over the last <b>2 weeks</b>, how often have you felt down, depressed or hopeless? <i>(Check ONE)</i></p> <p><input type="checkbox"/> Not at all <input type="checkbox"/> Several days <input type="checkbox"/> More than half the days <input type="checkbox"/> Nearly every day <input type="checkbox"/>DK <input type="checkbox"/> Refused</p>                                                                                                                                                                                                                                                                                                                                                                                                                                                                                                                                                                                                                                                                                                                                                                                                                                                                                                                                                                                                                      |                                                                                                                                                                                                                                                                                                                                                                                                                                                                                                                                                                                                                                                                                                                                                                                                                                                                                                                                                                                                                                                                                                                                                                                                                                                                                                                                                                                                                                                                                                                                                                                                                                                  |
| <p><b>Q43.</b> Over the last <b>2 weeks</b>, how often have you felt nervous, anxious, or on edge? <i>(Check ONE)</i></p> <p><input type="checkbox"/> Not at all <input type="checkbox"/> Several days <input type="checkbox"/> More than half the days <input type="checkbox"/> Nearly every day <input type="checkbox"/>DK <input type="checkbox"/> Refused</p>                                                                                                                                                                                                                                                                                                                                                                                                                                                                                                                                                                                                                                                                                                                                                                                                                                                                                                                                                                                                                     |                                                                                                                                                                                                                                                                                                                                                                                                                                                                                                                                                                                                                                                                                                                                                                                                                                                                                                                                                                                                                                                                                                                                                                                                                                                                                                                                                                                                                                                                                                                                                                                                                                                  |
| <p><b>Q44.</b> Over the last <b>2 weeks</b>, how often have you been unable to stop or control worrying? <i>(Check ONE)</i></p> <p><input type="checkbox"/> Not at all <input type="checkbox"/> Several days <input type="checkbox"/> More than half the days <input type="checkbox"/> Nearly every day <input type="checkbox"/>DK <input type="checkbox"/> Refused</p>                                                                                                                                                                                                                                                                                                                                                                                                                                                                                                                                                                                                                                                                                                                                                                                                                                                                                                                                                                                                               |                                                                                                                                                                                                                                                                                                                                                                                                                                                                                                                                                                                                                                                                                                                                                                                                                                                                                                                                                                                                                                                                                                                                                                                                                                                                                                                                                                                                                                                                                                                                                                                                                                                  |
| <p><b>Q45.</b> Now thinking about your mental health, which includes stress, depression, and problems with emotions, for how many days during the past 30 days was your mental health not good? ___#___ <input type="checkbox"/>DK <input type="checkbox"/> Refused</p>                                                                                                                                                                                                                                                                                                                                                                                                                                                                                                                                                                                                                                                                                                                                                                                                                                                                                                                                                                                                                                                                                                               |                                                                                                                                                                                                                                                                                                                                                                                                                                                                                                                                                                                                                                                                                                                                                                                                                                                                                                                                                                                                                                                                                                                                                                                                                                                                                                                                                                                                                                                                                                                                                                                                                                                  |
| <p><b>Q46.</b> Is there anything else you'd like to share with us about your life or HH? <input type="checkbox"/>DK <input type="checkbox"/> Refused</p>                                                                                                                                                                                                                                                                                                                                                                                                                                                                                                                                                                                                                                                                                                                                                                                                                                                                                                                                                                                                                                                                                                                                                                                                                              |                                                                                                                                                                                                                                                                                                                                                                                                                                                                                                                                                                                                                                                                                                                                                                                                                                                                                                                                                                                                                                                                                                                                                                                                                                                                                                                                                                                                                                                                                                                                                                                                                                                  |

**THANK YOU! THIS SURVEY WILL HELP US DESIGN HEALTH PROGRAMMING TO SUPPORT YOUR VILLAGE.**
